# Supplementary material for: Kinetics of aggregation in micellar solutions of thermoresponsive triblock copolymers – influence of concentration, start and target temperatures
Source: Royal Society of Chemistry journal article supplement (doi:10.1039/c2sm27152d), 2012-12-12
Supplement: c2sm27152d.pdf [file c2sm27152d.pdf]

Supporting Information

## Kinetics of aggregation in micellar solutions of thermoresponsive triblock copolymers – influence of concentration, start and target temperature

Joseph Adelsberger, Isabelle Grillo, Amit Kulkarni, Melissa Sharp, Achille M. Bivigou-Koumba, André Laschewsky, Peter Müller-Buschbaum and Christine M. Papadakis\*

Dr. J. Adelsberger, Dr. A. Kulkarni, Prof. Dr. P. Müller-Buschbaum, Prof. Dr. C.M. Papadakis

Technische Universität München, Physik-Department, Fachgebiet Physik Weicher Materie/Lehrstuhl für Funktionelle Materialien, James-Franck-Str. 1, 85748 Garching, Germany

E-mail: papadakis@tum.de

Dr. I. Grillo

Large Scale Structures Group, Institut Laue-Langevin, 6, rue Jules Horowitz, 38042 Grenoble, France

Dr. M. Sharp

Institut für Werkstoffforschung, Helmholtz-Zentrum Geesthacht, 21502 Geesthacht, Germany. Current affiliation: European Spallation Source (ESS), 221 00 Lund, Sweden.

Dr. A.M. Bivigou-Koumba, Prof. Dr. A. Laschewsky

Universität Potsdam, Institut für Chemie, Karl-Liebknecht-Str. 24-25, 14476 Potsdam-Golm, Germany

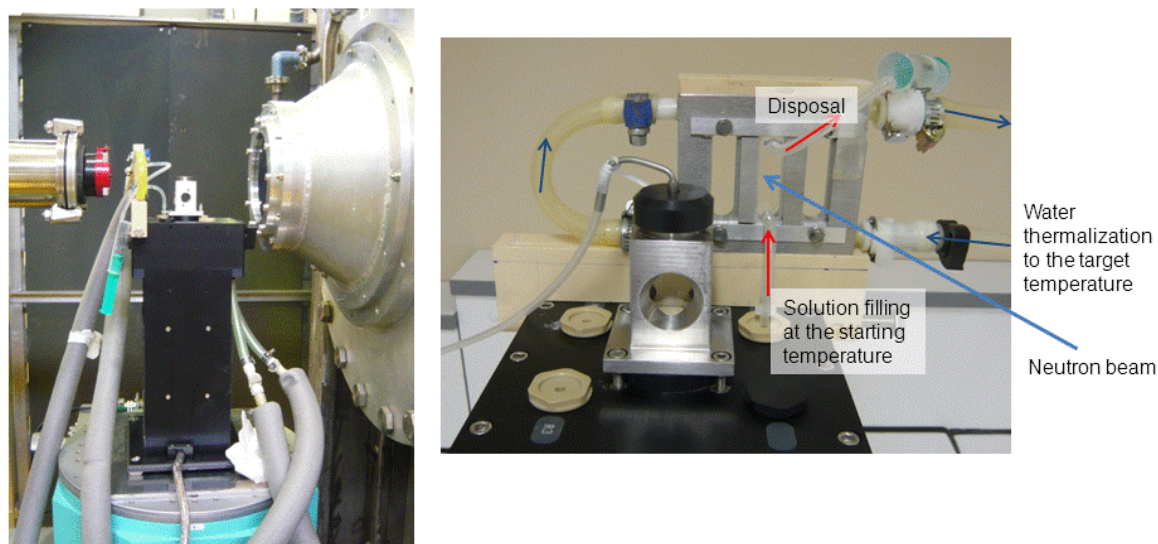

Figure S1: Photos of the modified stopped-flow cell used for time-resolved small-angle neutron scattering experiments during a temperature jump.
